1 **Mechanical and Microstructural Properties of Pediatric Anterior Cruciate Ligaments and**  
2 **Autograft Tendons used for Reconstruction**

3

4 **ABSTRACT**

5

6 **Background:** Over the last several decades there has been a steady increase in pediatric ACL  
7 tears, particularly in young female basketball and soccer players. Because allograft tissue for  
8 pediatric ACL reconstruction (ACLR) has shown high rates of failure, autograft tissue may be the  
9 best option for ACLR in this population. However, the differences in structure and mechanical  
10 behavior of these tissues are not clear.

11 **Purpose:** This study sought to characterize mechanical and microstructural properties in pediatric  
12 ACLs and autograft tissues using a rare cadaveric cohort (mean age 9.2 years).

13 **Study Design:** Descriptive laboratory study.

14 **Methods:** ACLs, patellar tendons, quadriceps tendons, semitendinosus tendons, and iliotibial  
15 bands (ITBs) were harvested from five fresh-frozen pediatric knee specimens (3M, 2F) and  
16 subjected to a tensile loading protocol. A subset of contralateral tissues were analyzed using  
17 brightfield, polarized light, and transmission electron microscopy.

18 **Results:** Patellar tendons exhibited values for ultimate stress ( $5.2 \pm 3.1$  MPa), ultimate strain  
19 ( $35.3 \pm 12.5\%$ ), and Young's Modulus ( $27.0 \pm 8.0$  MPa) that were most similar to the ACL ( $5.2 \pm 2.2$   
20 MPa;  $31.4 \pm 9.9\%$ ;  $23.6 \pm 15.5$  MPa). Semitendinosus tendons and ITBs were stronger but less  
21 compliant than the quadriceps or patellar tendons. ITBs exhibited crimp wavelengths ( $24.3 \pm 3.1$   
22  $\mu\text{m}$ ) and collagen fibril diameters ( $67.5 \pm 19.5$  nm) that were most similar to the ACL ( $24.4 \pm 3.2$   
23  $\mu\text{m}$ ;  $69.7 \pm 20.3$  nm).

24 **Conclusion:** The mechanical properties of the patellar tendon were almost identical to that of the  
25 ACL. The ITB exhibited increased strength and similar microstructure to the native ACL. These  
26 findings are not entirely congruent to studies examining adult tissues.

27 **Clinical Relevance:** Results suggest that ITB tissue may be the preferable choice as an autograft  
28 tissue in pediatric ACL reconstructions.

29 **Key Terms:** Pediatric, ACL reconstruction, mechanical properties, microstructural properties,  
30 patella tendon grafts, quadriceps tendon grafts, hamstring grafts

31 **What is Known about the Subject:** Due to the extreme rarity of pediatric cadaveric specimens,  
32 very little is known about these tissues.

33 **What this Study Adds to Existing Knowledge:** This suite of data can be used to further optimize  
34 the design and selection of grafts for reconstruction and may provide insight into the development  
35 of constitutive musculoskeletal models.

36

## 37 INTRODUCTION

38 A large amount of research has been devoted to characterizing the mechanical and  
39 microstructural properties of the tendons and ligaments surrounding the adult human knee. Due to  
40 the extreme rarity of these cadaveric specimens, relatively little is known about these properties in  
41 the pediatric population. While the effects of senescent aging on the tensile properties of these  
42 structures have been established,<sup>22,35,58</sup> extrapolating this data back to pre-pubescent ages is  
43 inadequate. Over the past several decades, the clinical need for this data in pediatric orthopedics  
44 has grown in parallel with the steady increase of diagnosed ligament tears in skeletally immature  
45 patients.<sup>3,11,27,36</sup> This trend has been attributed to several factors, including increased participation  
46 in youth sports, sport specialization, year-round play, and an increase in the number of adolescents

47 competing at higher levels of competition.<sup>13</sup> Pediatric ACL tears account for the majority of these  
48 knee injuries, particularly in young female soccer and basketball athletes.<sup>16,47</sup>

49 In the pediatric patient, surgical treatment of ACL deficiency is complicated by the potential  
50 risk of injury to the physis. There is currently large debate and practice variation in initial  
51 management, operative timing, and operative technique for pediatric ACL reconstruction (ACLR).  
52 Adolescents approaching skeletal maturity can be managed similar to adults with a complete  
53 transphyseal reconstruction.<sup>15</sup> However, if the patient's physes are still open, physeal-sparing or  
54 partial transphyseal techniques are often preferred in order to prevent premature physeal closure  
55 and post-operative growth disturbance.<sup>15,23,28</sup> In choosing the best course of treatment, the surgeon  
56 must consider both the pediatric patient's bone growth potential and the need for graft stability and  
57 durability in the face of a return to sport and a longer remaining lifespan.<sup>41</sup>

58 Graft choices for ACLR include the hamstrings tendon, bone-patellar tendon-bone, quadriceps  
59 tendon, and iliotibial band (ITB). Autografts are generally preferred because allografts have been  
60 shown to have increased failure rates in younger and more active children due to slower  
61 incorporation and higher infection rate.<sup>14</sup> Each of these graft options have been shown to be  
62 clinically successful, but also possess their own suite of risks. Unresolved issues regarding  
63 harvesting, biologic incorporation, and donor site morbidities remain controversial.<sup>9,25,54,57</sup>

64 There remains a dearth of knowledge about the mechanical and structural properties of  
65 autograft tissues in the pediatric population. It is currently unknown whether patellar tendon, ITB,  
66 or hamstring tendons possess the appropriate structural properties and mechanical durability to be  
67 well-suited to act as an ACL surrogate. Gaining a better understanding of these relationships will  
68 likely improve surgical outcomes in pediatric patients, particularly as ACLR procedure frequency  
69 continues to accelerate.<sup>40</sup> While many in vitro studies have examined the material properties of

70 ACLs and common grafts used for knee ligament reconstruction in adults <sup>48,49</sup> and in skeletally  
71 immature animal models,<sup>7,10,59</sup> to our knowledge, no analogous studies have been conducted for  
72 the pediatric population. Therefore, the purpose of this study was to characterize the mechanical  
73 properties and microstructure of ACLs and the most common tendons used for pediatric ACLR.

## 74 METHODS

75 Five fresh-frozen pediatric cadavers (3M, 2F, average age 9.2  
76 years) were acquired through donation from Allosource (Centennial,  
77 Colorado). Due to the rarity of this cohort, portions of the knees were  
78 dissected, refrozen at -20°C, and sent to various research labs  
79 throughout the country. This study received tissue samples from all  
80 five donors, primarily for the purposes of mechanical testing (Figure  
81 1). In some cases, tissues from the contralateral limb were also  
82 available for testing and microstructural analyses were performed on  
83 these specimens. Specifically, the contralateral ACLs from Donor 3  
84 (male, age 10) and Donor 4 (male, age 9) were available for  
85 hematoxylin-eosin (H&E) histology, polarized light, and transmission electron microscopy (TEM)  
86 analysis. All of the contralateral tendons and ligaments from Donor 5 (female, age 9) were also  
87 available and used for these microstructural analyses. This allowed for comparison between the  
88 ACL and different candidate autograft tissues within a single subject.

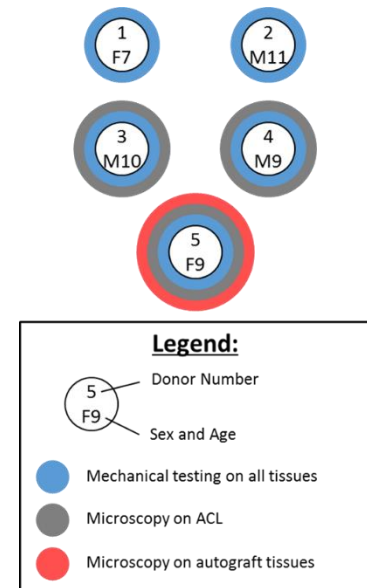

Figure 1: Schematic showing testing designations for the procured pediatric knee specimens.

90 *Mechanical Testing*

91 Mechanical testing was performed on a total of 25  
92 specimens from five donors. Specimens were prepared for testing  
93 by cutting them into standard dog bone shapes at the mid-  
94 substance (ACL, patellar tendon, quadriceps tendon; Figure 2A)  
95 or distal substance (semitendinosus and ITB) with a custom-built  
96 jig. Cross-sectional areas (CSAs) were measured along the gauge  
97 length of prepared specimens with a noncontact laser-based  
98 measurement system and averaged (Figure 2B). Specimen ends  
99 were then placed in custom aluminum clamps and attached to a 3  
100 kN load cell on a universal testing frame (TA Instruments  
101 ElectroForce 3330, Eden Prairie, MN) to perform uniaxial tensile  
102 testing (Figure 2C&D). One ACL (Donor 1) was excluded from  
103 testing due to its small size and poor quality, which made it  
104 impossible to test. Tissues were kept hydrated throughout sample  
105 preparation and mechanical testing.

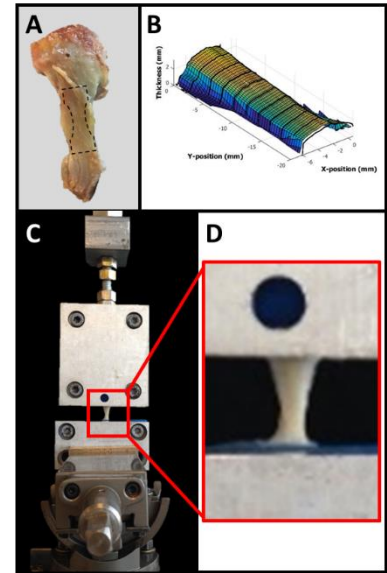

Figure 2: (A) Representative image of a harvested pediatric bone-patellar tendon-bone segment. The dashed lines show the location where the specimens were cut into dog-bone shapes at the mid-substance. (B) Topographical map of the middle portion of a dog-boned specimen taken with a laser based 3D scanner. (C&D) Photograph of the tensile testing setup showing how the custom-made grips and specimens were subjected to tensile loads.

106 The tensile loading protocol was based on a previously published study.<sup>33</sup> Briefly, the  
107 tissue was preloaded from a slack position to 5 N and then preconditioned with 10 cycles between  
108 10 N and 5 N at 0.4% strain rate. After dwelling at 5 N, the specimen underwent a stress-relaxation  
109 protocol followed by a ramp to failure at a constant quasistatic strain rate of 0.03% per second  
110 (Supplemental Figure 1). Failure of the specimen was confirmed mechanically by a sharp decrease  
111 in force and visually by the observance of frayed fibers at the mid substance. The viscoelastic  
112 parameter of percent relaxation was calculated as the percent change in stress from peak stress to

113 equilibrium (Figure 2A). A bilinear constitutive model with a least squares fit<sup>8,29,55</sup> (Figure 2B;  
114 Eq. 1) was applied to the stress-strain data to quantify the moduli in the toe and linear regions, as  
115 well as the stress and strain values corresponding to the transition point:

$$116 \quad \sigma = \begin{cases} E\varepsilon & \varepsilon \leq \varepsilon^* \\ E'(\varepsilon - \varepsilon^*) + E\varepsilon^* & \varepsilon > \varepsilon^* \end{cases} \quad \text{Eq. 1}$$

117 where  $E$  is the slope of the toe modulus,  $E'$  is the slope of Young's modulus,  $\varepsilon$  is the strain,  $\varepsilon^*$  is  
118 the transition strain, and  $\sigma$  is the stress. Although the toe region is non-linear, the model produced  
119 a practical and conservative approximation of the toe modulus and transition point. Stiffness was  
120 calculated as the slope of the load-displacement curve and strain energy density, which represents  
121 the energy absorbed before failure, was calculated as the area under the stress-strain curve.

### 122 *Histology and Polarized Light Microscopy*

123 Samples for histology were fixed in 10% neutral  
124 buffered formalin and embedded in paraffin. Serial sections  
125 (~8  $\mu\text{m}$ ) were stained with H&E and viewed with brightfield  
126 microscopy (Figure 3A). Ten randomly chosen regions  
127 (0.35 x 0.26  $\text{mm}^2$  each) were evaluated for each specimen  
128 and mean cell density was measured using Image-J software  
129 (NIH, Bethesda, MD). Collagen crimp properties were  
130 examined using polarized light microscopy, as previously  
131 described in the literature.<sup>30</sup> Crimp wavelength was  
132 determined by crossing the polarizer and analyzer at  $90^\circ$ ,  
133 rotating the specimens until maximal extinction in the dark  
134 crimp bands occurred, and calculating the distance spanned

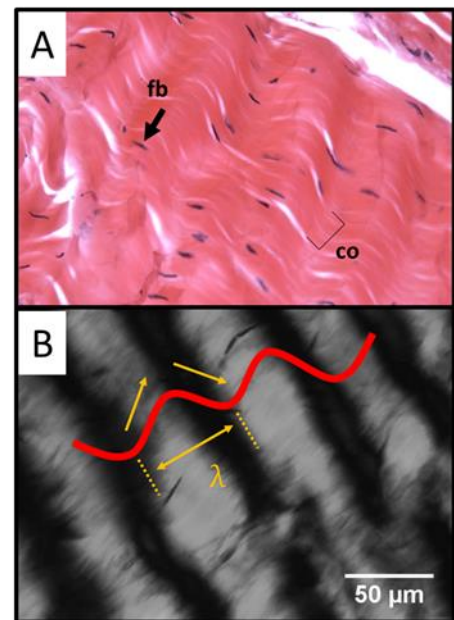

Figure 3: (A) H&E stained pediatric patellar tendon specimen viewed using brightfield microscopy. Fibroblast nuclei (fb) and collagen (co) are indicated. (B) Under polarized light microscopy, discrete crimps are identified and the wavelength ( $\lambda$ ) is measured in micrometers. 20X magnification, scale bar: 50  $\mu\text{m}$ .



135 by a dark and light band unit (Figure 3B).<sup>12,60</sup> Scaled images from ten randomly chosen regions  
136 (0.35 x 0.26 mm<sup>2</sup> each) were obtained and consecutive crimp wavelengths were individually  
137 measured and averaged. A minimum of 100 crimps were analyzed over the ten images for each  
138 specimen. The quality of the histology sections for one ACL (Donor 4) were determined to be too  
139 poor to be included in subsequent analysis and were consequently excluded.

#### 140 *Transmission Electron Microscopy*

141 Tissues for electron microscopic examination  
142 were fixed with 2.5% glutaraldehyde, 2.0%  
143 paraformaldehyde in 0.1M sodium cacodylate buffer  
144 overnight at 4°C. After subsequent buffer washes, the  
145 samples were post-fixed in 2.0% osmium tetroxide for  
146 1 hour at room temperature, and rinsed in DH<sub>2</sub>O prior  
147 to *en bloc* staining with 2% uranyl acetate. After  
148 dehydration through a graded ethanol series, the tissue  
149 was infiltrated and embedded in EMBED-812 (Electron  
150 Microscopy Sciences, Fort Washington, PA). Thin

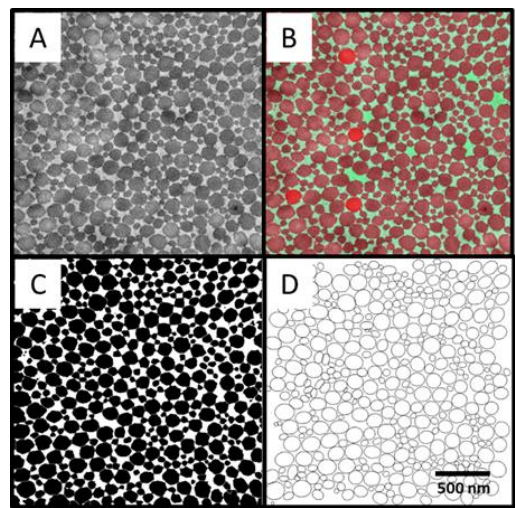

Figure 4: TEM micrograph analysis protocol. (A) Micrograph for a pediatric patellar tendon specimen. (B) Machine learning segmentation of fibrils (red) from background (green). (C) Complete segregation of the fibrils using thresholding and watershed techniques. (D) Ellipse fit to each individual fiber.

151 sections were stained with uranyl acetate and lead citrate and examined with an electron  
152 microscope (JEOL 1010, JEOL USA, Inc, Peabody, MA) fitted with a digital camera and AMT  
153 Advantage image capture software (Advanced Microscopy Techniques, Woburn, MA).

158 Ten micrographs were obtained at 60,000x magnification transverse to the load bearing  
159 axis for each specimen, and each micrograph was analyzed using a semi-automated protocol in  
160 Image-J/Fiji software<sup>44</sup> (Figure 4A). A machine learning classifier was trained to distinguish the  
161 darker fibrils from the lighter background of the micrograph (Figure 4B). The fibrils were then



162 completely differentiated from the background using a binary thresholding algorithm and  
163 separated from other fibril edges using a watershed segmentation algorithm (Figure 4C). Each  
164 discrete fibril was fit with an ellipse and the Feret's minor diameter was determined, which reduced  
165 error introduced by unintended oblique sectioning of the fibrils (Figure 4D). The distributions of  
166 fibril diameters were fit using a kernel density estimation to show the modality of their profiles.  
167 A minimum of 3,000 fibrils were analyzed over the 10 TEM micrographs for each specimen.

## 168 RESULTS

### 169 *Mechanical Testing*

170 The patellar tendon exhibited mechanical properties that were most similar to that of the  
171 ACL, particularly for ultimate stress, Young's modulus, and strain energy density (Table 1). The  
172 toe moduli of the patellar tendon and ACL were also similar, however, the transition stresses and  
173 transition strains of the patellar and quadriceps tendons were more similar to each other than to the  
174 ACL (Table 2). Pediatric semitendinosus tendon was stronger and less compliant than the ACL  
175 and other graft candidates in addition to exhibiting considerably larger values for Young's  
176 modulus, stiffness, and strain energy density. The patellar tendon exhibited the greatest percentage  
177 of stress-relaxation while the values for ACL, quadriceps tendon, semitendinosus tendon, and ITB  
178 were relatively similar.

**Table 1.** Results (mean  $\pm$  standard deviation) for pediatric ACL and graft candidate tendons obtained from tensile testing.

|                | <b>n</b> | <b>% Stress Relaxation</b> | <b>Ultimate Stress (MPa)</b> | <b>Ultimate Strain (%)</b> | <b>Young's Modulus (MPa)</b> | <b>Stiffness (N/mm)</b> | <b>Strain Energy Density (MPa)</b> |
|----------------|----------|----------------------------|------------------------------|----------------------------|------------------------------|-------------------------|------------------------------------|
| ACL            | 4        | 26.5 $\pm$ 9.2             | 5.2 $\pm$ 2.2                | 31.4 $\pm$ 9.9             | 23.6 $\pm$ 15.5              | 39.6 $\pm$ 17.6         | 0.8 $\pm$ 0.4                      |
| Patellar       | 5        | 40.6 $\pm$ 4.8             | 5.2 $\pm$ 3.1                | 35.3 $\pm$ 12.5            | 27.0 $\pm$ 8.8               | 17.5 $\pm$ 5.9          | 1.2 $\pm$ 0.9                      |
| Quadriceps     | 5        | 33.2 $\pm$ 9.8             | 12.1 $\pm$ 8.3               | 38.9 $\pm$ 15.7            | 61.9 $\pm$ 65.0              | 39.1 $\pm$ 31.6         | 2.5 $\pm$ 1.9                      |
| Semitendinosus | 5        | 26.7 $\pm$ 4.7             | 29.0 $\pm$ 11.6              | 20.8 $\pm$ 7.2             | 197.2 $\pm$ 34.4             | 100.8 $\pm$ 17.6        | 3.1 $\pm$ 1.9                      |
| ITB            | 5        | 22.6 $\pm$ 3.0             | 29.0 $\pm$ 10.6              | 28.1 $\pm$ 10.6            | 161.7 $\pm$ 100.2            | 61.6 $\pm$ 22.5         | 3.8 $\pm$ 1.3                      |

179

**Table 2.** Toe region results (mean  $\pm$  standard deviation) for pediatric ACL and graft candidate tendons obtained from tensile testing.

|                | <b>n</b> | <b>Transition Stress (MPa)</b> | <b>Transition Strain (%)</b> | <b>Toe Modulus (MPa)</b> |
|----------------|----------|--------------------------------|------------------------------|--------------------------|
| ACL            | 4        | 0.8 $\pm$ 0.3                  | 5.5 $\pm$ 1.9                | 13.1 $\pm$ 7.2           |
| Patella        | 5        | 0.4 $\pm$ 0.2                  | 2.4 $\pm$ 0.7                | 16.9 $\pm$ 6.0           |
| Quadriceps     | 5        | 1.0 $\pm$ 1.1                  | 2.8 $\pm$ 0.3                | 33.6 $\pm$ 37.7          |
| Semitendinosus | 5        | 3.0 $\pm$ 1.6                  | 5.1 $\pm$ 2.7                | 65.2 $\pm$ 13.5          |
| ITB            | 5        | 2.8 $\pm$ 0.9                  | 6.2 $\pm$ 5.2                | 58.9 $\pm$ 29.5          |

180

181

182 *Histology, Polarized Light, and TEM*

183 Cell density analysis of H&E stained sections showed higher concentrations of fibroblasts  
 184 in the ACL and ITB samples from Donor 5 compared to the other tendons (Figure 5; Table 3).  
 185 Mean fibroblast cell count in the ITB was considerably greater ( $1734.4 \pm 327.9$  cells/mm<sup>2</sup>) than  
 186 the other candidate graft tendons, especially the quadriceps tendon ( $296.5 \pm 49.2$  cells/mm<sup>2</sup>).

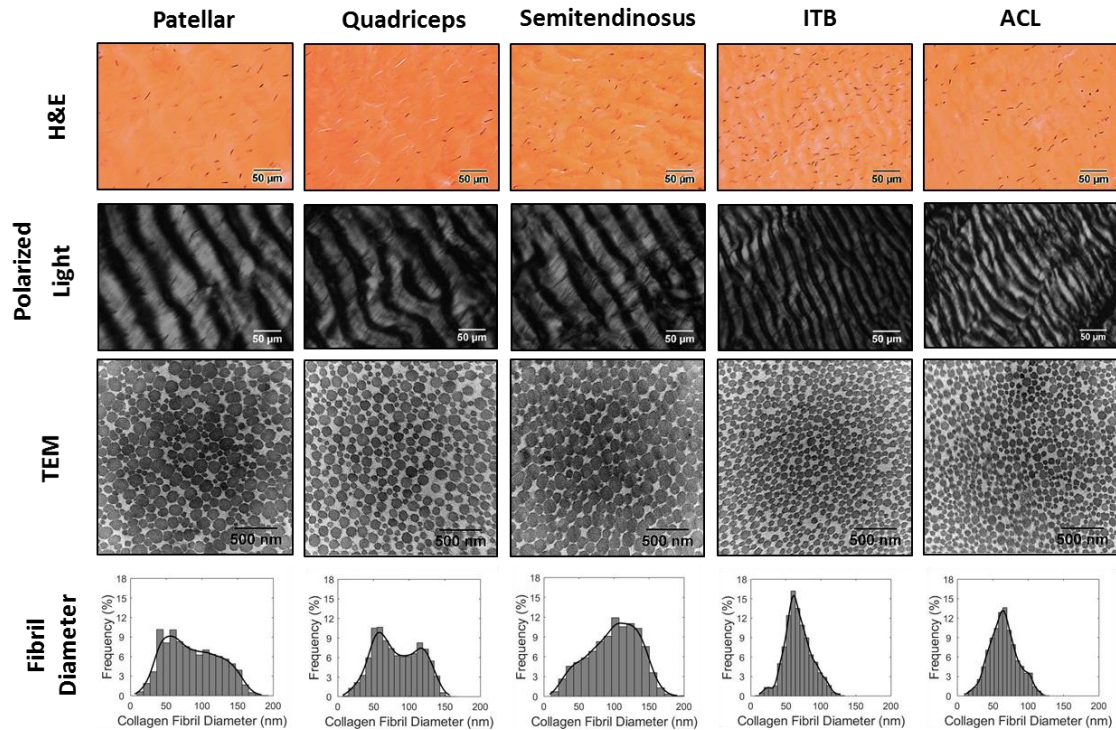

187

188 *Figure 5: Histology, polarized light, and TEM results for the pediatric patellar tendon, quadriceps tendon,*  
 189 *ITB, and ACL samples. First row: representative H&E-stained histology sections. Second row: representative polarized light images*  
 190 *showing crimp morphology. Third row: TEM micrographs showing collagen fibril cross sections. Fourth row: histograms of collagen*  
 191 *fibril diameters.*

**Table 3.** Microstructural analysis results (mean ± standard deviation) for pediatric ACL and graft candidate tendons

|                | n    | Fibroblast Density (cells/mm <sup>2</sup> ) | Crimp Wavelength (µm) | Collagen Fibril Diameter (nm) |
|----------------|------|---------------------------------------------|-----------------------|-------------------------------|
| ACL            | 2-3* | 829.6 ± 101.7                               | 24.4 ± 3.2            | 65.3 ± 19.9                   |
| Patella        | 1    | 606.1 ± 90.9                                | 61.9 ± 8.7            | 86.4 ± 37.2                   |
| Quadriceps     | 1    | 296.5 ± 49.2                                | 52.1 ± 5.6            | 82.6 ± 31.7                   |
| Semitendinosus | 1    | 553.8 ± 118.5                               | 48.5 ± 3.8            | 99.2 ± 35.6                   |
| ITB            | 1    | 1734.4 ± 327.9                              | 27.0 ± 2.9            | 67.5 ± 19.5                   |

\* Donor 4 fibroblast density and crimp wavelength results excluded

192

193 Polarized light analysis of crimp morphology revealed interesting similarities and  
 194 differences between the ACL and the knee tendons of interest (Figure 5). In all of the samples  
 195 studied, crimp wavelengths appeared extremely uniform, with low amounts of intrafiber variation

196 within the same specimen. The patellar tendon, quadriceps tendon, and semitendinosus tendon  
197 displayed longer crimp lengths compared to the ITB and ACL samples (Table 3). Average crimp  
198 wavelength for the ACLs from two separate donors was  $24.4 \pm 3.2 \mu\text{m}$ .

199 Results for specimen collagen fiber diameters were similar to that for the crimp  
200 wavelengths, with the ITB being most similar to the ACLs. Fibrils in the patellar tendon trended  
201 towards smaller diameters, while those in the semitendinosus trended towards larger diameters.  
202 The fibrils in the quadriceps tendon were bimodally distributed between large and small diameters.  
203 Average fibril diameter for the ACLs from three separate donors exhibited a distinctly unimodal  
204 distribution profile centered around a mean of  $69.7 \pm 20.3 \text{ nm}$  (Supplemental Figure 2).

## 205 DISCUSSION

206 Little is known about the  
207 mechanical behavior and  
208 microstructural properties of pediatric  
209 ACLs and the periarticular tissues most  
210 commonly utilized for its  
211 reconstruction. Result from this study  
212 demonstrated that mechanical  
213 properties were considerably weaker  
214 than what has been documented for the  
215 same structures in healthy adult  
216 populations (Figure 6). Interestingly, there are also relative differences in mechanical properties  
217 between the native ACL and autograft tendons in adults. For example, all three graft tissues have  
218 been shown to exhibit ultimate tensile loads and stiffnesses that are higher than that reported for

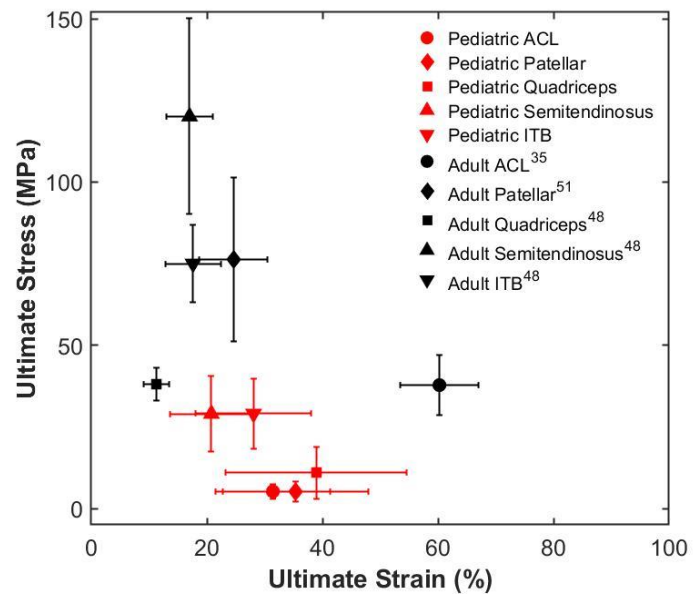

Figure 6: Ultimate stress-strain plot for the data presented by the current study (non-filled points) compared to data reported in the adult population (filled points). Data points represent the average ultimate stress and ultimate strain and the error bars indicate the standard deviation.

219 the native ACL.<sup>18,20,32,34,51,56</sup> Adult hamstrings tendons seem to possess the strongest mechanical  
220 properties and have previously been shown to exhibit significantly higher elastic modulus  
221 (1036±312 MPa) and ultimate stress values (120.1±30.0 MPa) than other graft candidates,  
222 including the patellar tendon (417±107 MPa, 76.2±25.1 MPa).<sup>48</sup> This is in agreement with our data  
223 for a pediatric population, which showed that the semitendinosus tendons and ITBs are stronger  
224 and less compliant than the quadriceps or patellar tendons. We also found relatively large subject-  
225 subject variability in the mechanical data for our pediatric specimens, especially for the quadriceps  
226 tendon. This could be attributed to donor factors such as age, sex, BMI, and physical activity level,  
227 which we could not control for due to the rarity of the donor cohort. Large variations in mechanical  
228 properties of adult tendons and ligaments have been previously reported in the literature<sup>48</sup> and has  
229 been further attributed to individual biological variation in collagen fiber maturity, fiber alignment,  
230 interfiber cross-linkages and fiber-matrix interaction.<sup>33</sup>

231 Functional properties in tendons and ligaments have been shown to be influenced by the  
232 morphology of collagen fibrils. Examination of the microstructure in samples harvested from the  
233 same knee of one donor revealed distinct differences between the pediatric ACL and the four  
234 candidate graft tendons. Crimp morphology has been linked to tendon mechanical function and  
235 there is evidence demonstrating that collagen crimp characteristics are strongly tendon-type  
236 specific.<sup>50</sup> Collagen crimps function as a buffer to provide immediate longitudinal elongation in  
237 response to load and the non-linear toe region of the stress-strain curve represents the extension of  
238 these crimps (Figure 3B).<sup>26</sup> Past the transition point and into the linear region, the crimps are fully  
239 recruited and resistance is provided by the stretching of the collagen triple helix and the cross  
240 linkages between these helices. In tendons and ligaments, higher crimp frequency likely provides  
241 a protection to the structure during sudden increases in intrinsic forces produced by muscular

242 contractions and compressive joint loads.<sup>12,45</sup> Results from the current study show that patellar,  
243 quadriceps, and semitendinosus tendon samples possessed a lower crimp frequency compared to  
244 the ITB and the ACL. This may help to explain the slightly more prolonged toe region for the  
245 pediatric ACL (Table 2). The behavior of the toe and transition region is often neglected in the  
246 literature, yet it is important to document because ligament strains during activities of daily living  
247 and rehabilitation occur within this region.<sup>5,8</sup> Beynnon & Fleming demonstrated in an *in vivo* study  
248 that the strains in the mid substance of the ACL rarely exceed 4% in both weight-bearing and non-  
249 weight bearing activities involving varying degrees of knee extension.<sup>5</sup> Using a mouse model,  
250 Miller et al. found that developmentally younger tendons required longer exposure to mechanical  
251 load before structurally responding through uncrimping, resulting in higher transition strains.<sup>33</sup>  
252 Interestingly, the pediatric ITB did not exhibit toe region properties similar to the ACL, which  
253 demonstrates that the uncrimping of collagen fibers is not the only mechanism driving toe-region  
254 properties. For example, collagen fiber crimp frequency has been found to be dependent upon the  
255 number of preconditioning cycles that are applied<sup>33</sup> and it has also been suggested that crimp  
256 frequency is heterogeneous along the length of a tendon.<sup>19,52</sup>

257         The patellar, quadriceps, and semitendinosus tendons showed wider distributions of  
258 collagen fibril diameters than the ITB and ACL, which appeared to be predominantly composed  
259 of small-diameter fibrils (Figure 5). Mean fibril diameters for the patellar, quadriceps, and  
260 semitendinosus tendons were similar to the values reported in the literature for adult samples.<sup>1,17,53</sup>  
261 The mean fibril diameter for the pediatric ACL was considerably smaller than what has been  
262 reported for adults.<sup>17</sup> Little to no information exists in the literature regarding collagen fibril  
263 ultrastructure for adult human ITBs. When considering animal models, Qu et al. found  
264 significantly higher collagen fibril density and smaller fibril diameters in immature bovine ACLs

265 (102 ± 11.6 nm) compared to a mature group (124.1 ± 22 nm).<sup>42</sup> They also observed a unimodal  
266 distribution of fibril diameters in the immature group and a 3-fold increase in variance in the  
267 mature group. It is possible that the ACL is composed of immature networks of collagen fibers for  
268 a longer period of time than the periarticular knee tendons.

269 Collagen fibril diameter size may be reflective of functional adaptations to physiological  
270 loads. Fibrils have been shown to be smaller and unimodally distributed at birth, becoming larger  
271 and bimodally distributed at maturity.<sup>37,38</sup> The existence of a true correlation between collagen  
272 fibril size and higher stiffness is controversial, but it is a likely contributor. Parry et al. posited that  
273 the bimodal distribution of fibril size was optimized so that larger fibrils provided high tensile  
274 strength and the smaller fibers provided resistance to creep by increasing the density of  
275 interfibrillar electrostatic interactions.<sup>39</sup>

276 This study has several limitations. Most notably, the sample size in this experiment was  
277 low. Due to the rarity of these donors and the use of the specimens across several research labs,  
278 this drawback is currently unavoidable. It was difficult to make direct comparisons between the  
279 current study and previous studies with adult cohorts. Differences in donor age, sex, physical  
280 condition, skeletal maturity, as well as graft size, ramp to failure strain rate, graft construct  
281 configuration, method of CSA calculation, and clamping technique can all confound results.<sup>8,56</sup>  
282 The strength of tendons and ligaments has been shown to be dependent on strain rate.<sup>6,24</sup> To  
283 minimize viscoelastic effects, the ramp to failure strain rate was kept at 0.03%/s, which was  
284 deliberately chosen to capture toe region properties. Previous studies have utilized strain rates as  
285 high as 100%/s to simulate the fast strain rate in accidents and acute injuries.<sup>6,21,35</sup> This study  
286 characterized the mechanical behavior of the tissue at the mid-substance (ACL, patellar tendon,  
287 quadriceps tendon) or distal third substance (semitendinosus tendon, ITB) of the tendon or



288 ligament with uniaxial *ex vivo* testing. Many factors that are known to contribute to the strength  
289 and durability of an ACLR graft *in vivo*, such as post-operative ligamentization and ligament  
290 anchoring,<sup>48</sup> were not considered. In addition, the anatomical direction of tension is not always  
291 axially directed. The ACL is structurally designed to withstand multiaxial stresses that can vary in  
292 direction and magnitude along the length of the tissue, which may lead to changes in mechanical  
293 and microstructural properties. Many studies have looked at the regional variation in tendon and  
294 ligament properties in adults, and this may be a direction for future research in the pediatric  
295 population<sup>2,4</sup>.

### 296 *Clinical Implications*

297 Surgical management of ACL deficiency in pediatric patients is complex and many factors  
298 can contribute to graft selection for reconstruction. Optimizing ACLR in the pediatric patient  
299 population requires a more thorough understanding of anatomical graft placement, the mechanical  
300 properties of candidate grafts, the mechanical behavior and strength of anchoring techniques, and  
301 the biological processes that occur during graft incorporation. While the mechanical properties of  
302 the pediatric patellar tendon were almost identical to that of the pediatric ACL, the semitendinosus  
303 and ITB were considerably stronger and could resist loads that make the ACL prone to reinjury or  
304 caused the injury in the first place. Another important consideration is that the mechanical  
305 properties of ACLR grafts have been demonstrated to decrease during the remodeling process and  
306 never return to normal,<sup>43</sup> making these even more attractive graft candidates.

307 Double-bundle reconstruction has been used in an effort to improve knee stability and  
308 restore the biomechanical characteristics of the intact ACL. Some previous work has identified  
309 higher risk of physeal injury with double bundle techniques in those with open physis, and thus,  
310 these procedures may not be ideal in younger patients with significant growth remaining.<sup>46</sup>

311 Younger children often possess small hamstrings tendons that have insufficient graft diameter,  
312 yield smaller final graft sizes, and ultimately increase the likelihood of revision. In cases whereby  
313 smaller hamstring graft sizes are noted intraoperatively there is a recent trend toward increasing  
314 the number of strands used via a folding technique which increases graft diameter.<sup>31</sup> This study  
315 assessed the mechanical properties of the distal third substance of non-folded semitendinosus  
316 tendon and does not consider the mechanical implications of the folding techniques that are used  
317 for multi-bundle reconstructions (such as 4, 6, 8 strand constructs), however this would be an  
318 excellent direction for future research.

319         The incidence of pediatric ACL injuries has increased significantly over the past several  
320 decades as youth participation and specialization in sports has increased. Despite this, there is a  
321 dearth of information on the mechanical and microstructural properties of pediatric knee tendons  
322 and ligaments in the literature. Further optimization of the pediatric ACLR procedure such that the  
323 surrogate graft is the most appropriate mechanical and biologic option for the patient will  
324 ultimately improve surgical outcomes. This study utilized a small and extremely rare sample of  
325 pediatric cadaveric knees to develop a comprehensive suite of data on the pediatric ACL and the  
326 most common tendons used for reconstruction in the pediatric knee. Our data showed that different  
327 autografts possess distinct mechanical properties that often differ markedly from the ACL. This  
328 data can be used to inform the selection of grafts for reconstruction, the design and fabrication of  
329 synthetic constructs, and also to develop constitutive musculoskeletal models that can be applied  
330 to clinically relevant loading conditions that are difficult to test with bench-top experiments alone.

331 **ACKNOWLEDGMENTS**

332 The authors thank Allosource for the donation of the specimens used in this study. This study was  
333 supported by the Penn Center for Musculoskeletal Disorders Histology Core (NIH P30-AR06919)  
334 and by the Electron Microscopy Resource Laboratory of the University of Pennsylvania.

## 335 REFERENCES

- 336 1. Abe S, Kurosaka M, Iguchi T, Yoshiya S, Hirohata K. Light and electron microscopic study  
337 of remodeling and maturation process in autogenous graft for anterior cruciate ligament  
338 reconstruction. *Arthrosc J Arthrosc Relat Surg*. 1993;9(4):394-405.
- 339 2. Abramowitch SD, Zhang X, Curran M, Kilger R. A Comparison of the Quasi-static  
340 Mechanical and Nonlinear Viscoelastic Properties of the Human Semitendinosus and  
341 Gracilis Tendons. *Clin Biomech Bristol Avon*. 2010;25(4):325-331.
- 342 3. Arbes S, Resinger C, Vécsei V, Nau T. The functional outcome of total tears of the anterior  
343 cruciate ligament (ACL) in the skeletally immature patient. *Int Orthop*. 2007;31(4):471-  
344 475.
- 345 4. Beaulieu ML, Carey GE, Schlecht SH, Wojtys EM, Ashton-Miller JA. On the heterogeneity  
346 of the femoral enthesis of the human ACL: microscopic anatomy and clinical implications.  
347 *J Exp Orthop*. 2016;3(1):14.
- 348 5. Beynon BD, Fleming BC. Anterior cruciate ligament strain in-vivo: A review of previous  
349 work. *J Biomech*. 1998;31(6):519-525.
- 350 6. Blevins FT, Hecker AT, Bigler GT, Boland AL, Hayes WC. The Effects of Donor Age and  
351 Strain Rate on the Biomechanical Properties of Bone-Patellar Tendon-Bone Allografts. *Am*  
352 *J Sports Med*. 1994;22(3):328-333.

- 353 7. Blickenstaff KR, Grana WA, Egle D. Analysis of a Semitendinosus Autograft in a Rabbit  
354 Model. *Am J Sports Med.* 1997;25(4):554-559.
- 355 8. Chandrashekar N, Hashemi J, Slaughterbeck J, Beynon BD. Low-load behaviour of the  
356 patellar tendon graft and its relevance to the biomechanics of the reconstructed knee. *Clin*  
357 *Biomech.* 2008;23(7):918-925.
- 358 9. Courvoisier A, Grimaldi M, Plaweski S. Good surgical outcome of transphyseal ACL  
359 reconstruction in skeletally immature patients using four-strand hamstring graft. *Knee Surg*  
360 *Sports Traumatol Arthrosc.* 2011;19(4):588-591.
- 361 10. Danto MI, Woo SL-Y. The mechanical properties of skeletally mature rabbit anterior  
362 cruciate ligament and patellar tendon over a range of strain rates. *J Orthop Res.* 11(1):58-  
363 67.
- 364 11. DeLEE J, Curtis R. Anterior cruciate ligament insufficiency in children. *Clin Orthop.*  
365 1983;172:112-118.
- 366 12. Diamant J, Keller A, Baer E, Litt M, Arridge RGC. Collagen; Ultrastructure and Its  
367 Relation to Mechanical Properties as a Function of Ageing. *Proc R Soc Lond B Biol Sci.*  
368 1972;180(1060):293-315.
- 369 13. Dodwell ER, LaMont LE, Green DW, Pan TJ, Marx RG, Lyman S. 20 Years of Pediatric  
370 Anterior Cruciate Ligament Reconstruction in New York State. *Am J Sports Med.*  
371 2014;42(3):675-680.

- 372 14. Ellis HB, Matheny LM, Briggs KK, Pennock AT, Steadman JR. Outcomes and Revision  
373 Rate After Bone–Patellar Tendon–Bone Allograft Versus Autograft Anterior Cruciate  
374 Ligament Reconstruction in Patients Aged 18 Years or Younger With Closed Physes.  
375 *Arthrosc J Arthrosc Relat Surg.* 2012;28(12):1819-1825.
- 376 15. Frank JS, Gambacorta PLD. Anterior Cruciate Ligament Injuries in the Skeletally Immature  
377 Athlete: Diagnosis and Management. [Review]. *J Am Acad Orthop Surg.* 2013;21(2):78-  
378 87.
- 379 16. Gottschalk AW, Andrish JT. Epidemiology of Sports Injury in Pediatric Athletes.  
380 [Review]. *Sports Med Arthrosc Rev.* 2011;19(1):2-6.
- 381 17. Hadjicostas PT, Soucacos PN, Koleganova N, Krohmer G, Berger I. Comparative and  
382 morphological analysis of commonly used autografts for anterior cruciate ligament  
383 reconstruction with the native ACL: an electron, microscopic and morphologic study. *Knee*  
384 *Surg Sports Traumatol Arthrosc.* 2008;16(12):1099-1107.
- 385 18. Hamner DLMD, Brown CHJ, Steiner MEMD, Hecker ATMS#, Hayes WCPD#. Hamstring  
386 Tendon Grafts for Reconstruction of the Anterior Cruciate Ligament: Biomechanical  
387 Evaluation of the Use of Multiple Strands and Tensioning Techniques\*. *J Bone.*  
388 1999;81(4):549-557.
- 389 19. Hansen KA, Weiss JA, Barton JK. Recruitment of Tendon Crimp With Applied Tensile  
390 Strain. *J Biomech Eng.* 2002;124(1):72-77.

- 391 20. Harris NL, Smith DAB, Lamoreaux L, Purnell M. Central Quadriceps Tendon for Anterior  
392 Cruciate Ligament Reconstruction: Part I: Morphometric and Biomechanical Evaluation.  
393 *Am J Sports Med.* 1997;25(1):23-28.
- 394 21. Hashemi J, Chandrashekar N, Mansouri H, Slauterbeck JR, Hardy DM. The human anterior  
395 cruciate ligament: Sex differences in ultrastructure and correlation with biomechanical  
396 properties. *J Orthop Res.* 2008;26(7):945-950.
- 397 22. Johnson GA, Tramaglini DM, Levine RE, Ohno K, Choi N-Y, L-Y. Woo S. Tensile and  
398 viscoelastic properties of human patellar tendon. *J Orthop Res.* 1994;12(6):796-803.
- 399 23. Kaeding CC, Flanigan D, Donaldson C. Surgical Techniques and Outcomes After Anterior  
400 Cruciate Ligament Reconstruction in Preadolescent Patients. *Arthrosc J Arthrosc Relat*  
401 *Surg.* 2010;26(11):1530-1538.
- 402 24. Kahn CJF, Wang X, Rahouadj R. Nonlinear Model for Viscoelastic Behavior of Achilles  
403 Tendon. *J Biomech Eng.* 2010;132(11):111002.
- 404 25. Kane PW, Wascher J, Dodson CC, Hammoud S, Cohen SB, Ciccotti MG. Anterior cruciate  
405 ligament reconstruction with bone-patellar tendon-bone autograft versus allograft in  
406 skeletally mature patients aged 25 years or younger. *Knee Surg Sports Traumatol Arthrosc.*  
407 2016;24(11):3627-3633.
- 408 26. Kastelic J, Palley I, Baer E. A structural mechanical model for tendon crimping. *J Biomech.*  
409 1980;13(10):887-893.

- 410 27. Kocher MSM, Shore B, Nasreddine AY, Heyworth BE. Treatment of Posterior Cruciate  
411 Ligament Injuries in Pediatric and Adolescent Patients. *J Pediatr Orthop*. 2012;32(6):553-  
412 560.
- 413 28. Kumar SM, Ahearne DF, Hunt DMF. Transphyseal Anterior Cruciate Ligament  
414 Reconstruction in the Skeletally Immature: Follow-up to a Minimum of Sixteen Years of  
415 Age. *J Bone*. 2013;95(1).
- 416 29. Lake SP, Miller KS, Elliott DM, Soslowky LJ. Effect of fiber distribution and realignment  
417 on the nonlinear and inhomogeneous mechanical properties of human supraspinatus tendon  
418 under longitudinal tensile loading. *J Orthop Res*. 2009;27(12):1596-1602.
- 419 30. Lake SP, Miller KS, Elliott DM, Soslowky LJ. Tensile properties and fiber alignment of  
420 human supraspinatus tendon in the transverse direction demonstrate inhomogeneity,  
421 nonlinearity and regional isotropy. *J Biomech*. 2010;43(4):727-732.
- 422 31. Lee RJ, Ganley TJ. The 5-Strand Hamstring Graft in Anterior Cruciate Ligament  
423 Reconstruction. *Arthrosc Tech*. 2014;3(5):e627-e631.
- 424 32. Markolf KLPD, Burchfield DMMD, Shapiro MMMD, Davis BRMD, Finerman GAMMD,  
425 Slauterbeck JLMD+. Biomechanical Consequences of Replacement of the Anterior  
426 Cruciate Ligament with a Patellar Ligament Allograft. Part I: Insertion of the Graft and  
427 Anterior-Posterior Testing\*. *J Bone*. 1996;78(11):1720-1727.
- 428 33. Miller KS, Connizzo BK, Feeney E, Tucker JJ, Soslowky LJ. Examining Differences in  
429 Local Collagen Fiber Crimp Frequency Throughout Mechanical Testing in a



- 430           Developmental Mouse Supraspinatus Tendon Model. *J Biomech Eng.* 2012;134(4):41004-  
431           NaN.
- 432   34.   Noyes FR, Butler DL, Grood ES, Zernicke RF, Hefzy MS. Biomechanical analysis of  
433           human ligament grafts used in knee-ligament repairs and reconstructions. *J Bone.*  
434           1984;66(3):344-352.
- 435   35.   Noyes FR, Grood ES. The strength of the anterior cruciate ligament in humans and Rhesus  
436           monkeys. *J Bone.* 1976;58(8):1074-1082.
- 437   36.   O'Brien TD, Reeves ND, Baltzopoulos V, Jones DA, Maganaris CN. Mechanical properties  
438           of the patellar tendon in adults and children. *J Biomech.* 2010;43(6):1190-1195.
- 439   37.   Parry D a. D, Barnes GRG, Craig AS. A comparison of the size distribution of collagen  
440           fibrils in connective tissues as a function of age and a possible relation between fibril size  
441           distribution and mechanical properties. *Proc R Soc Lond B.* 1978;203(1152):305-321.
- 442   38.   Parry D a. D, Craig AS. Quantitative electron microscope observations of the collagen  
443           fibrils in rat-tail tendon. *Biopolymers.* 1977;16(5):1015-1031.
- 444   39.   Parry DAD. The molecular fibrillar structure of collagen and its relationship to the  
445           mechanical properties of connective tissue. *Biophys Chem.* 1988;29(1):195-209.
- 446   40.   Petrigliano FA, McAllister DR, Wu BM. Tissue Engineering for Anterior Cruciate  
447           Ligament Reconstruction: A Review of Current Strategies. *Arthrosc J Arthrosc Relat Surg.*  
448           2006;22(4):441-451.

- 449 41. Pierce TP, Issa K, Festa A, Scillia AJ, McInerney VK. Pediatric Anterior Cruciate  
450 Ligament Reconstruction: A Systematic Review of Transphyseal Versus Physeal-Sparing  
451 Techniques. *Am J Sports Med.* 2017;45(2):488-494.
- 452 42. Qu D, Chuang PJ, Prateepchinda S, et al. Micro- and Ultrastructural Characterization of  
453 Age-Related Changes at the Anterior Cruciate Ligament-to-Bone Insertion. *ACS Biomater*  
454 *Sci Eng.* 2017;3(11):2806-2814.
- 455 43. Scheffler SU, Unterhauser FN, Weiler A. Graft remodeling and ligamentization after  
456 cruciate ligament reconstruction. *Knee Surg Sports Traumatol Arthrosc.* 2008;16(9):834-  
457 842.
- 458 44. Schindelin J, Arganda-Carreras I, Frise E, et al. Fiji - an Open Source platform for  
459 biological image analysis. *Nat Methods.* 2012;9(7).
- 460 45. Screen HRC, Lee DA, Bader DL, Shelton JC. An investigation into the effects of the  
461 hierarchical structure of tendon fascicles on micromechanical properties. *Proc Inst Mech*  
462 *Eng [H].* 2004;218(2):109-119.
- 463 46. Shea KG, Grimm NL, Belzer JS. Volumetric Injury of the Distal Femoral Physis During  
464 Double-Bundle ACL Reconstruction in Children: A Three-Dimensional Study with Use of  
465 Magnetic Resonance Imaging. *J Bone Jt Surg-Am Vol.* 2011;93(11):1033-1038.
- 466 47. Shea KG, Pfeiffer R, Wang JH, Curtin M, Apel PJ. Anterior Cruciate Ligament Injury in  
467 Pediatric and Adolescent Soccer Players: An Analysis of Insurance Data. *J Pediatr Orthop.*  
468 2004;24(6):623.

- 469 48. Smeets K, Bellemans J, Scheys L, Eijnde BO, Slane J, Claes S. Mechanical Analysis of  
470 Extra-Articular Knee Ligaments. Part two: Tendon grafts used for knee ligament  
471 reconstruction. *The Knee*. 2017;24(5):957-964.
- 472 49. Smeets K, Slane J, Scheys L, Claes S, Bellemans J. Mechanical Analysis of Extra-Articular  
473 Knee Ligaments. Part One: Native knee ligaments. *The Knee*. 2017;24(5):949-956.
- 474 50. Spiesz EM, Thorpe CT, Thurner PJ, Screen HRC. Structure and collagen crimp patterns of  
475 functionally distinct equine tendons, revealed by quantitative polarised light microscopy  
476 (qPLM). *Acta Biomater*. 2018;70:281-292.
- 477 51. Stäubli HU, Schatzmann L, Brunner P, Rincón L, Nolte L-P. Mechanical Tensile Properties  
478 of the Quadriceps Tendon and Patellar Ligament in Young Adults. *Am J Sports Med*.  
479 1999;27(1):27-34.
- 480 52. Stouffer DC, Butler DL, Hosny D. The Relationship Between Crimp Pattern and  
481 Mechanical Response of Human Patellar Tendon-Bone Units. *J Biomech Eng*.  
482 1985;107(2):158-165.
- 483 53. Stocchi R, de Pasquale V, Gubellini P, et al. The human anterior cruciate ligament:  
484 histological and ultrastructural observations. *J Anat*. 1992;180(Pt 3):515-519.
- 485 54. Vaughn NH, Jackson T, Hennrikus WL. Anterior Cruciate Ligament Reconstruction Using  
486 Quadriceps Tendon Autograft in Adolescent Athletes. *Pediatrics*. 2018;141(1  
487 MeetingAbstract):194-194.

- 488 55. Wan C, Hao Z, Wen S, Leng H. A Quantitative Study of the Relationship between the  
489 Distribution of Different Types of Collagen and the Mechanical Behavior of Rabbit Medial  
490 Collateral Ligaments. *PLOS ONE*. 2014;9(7):e103363.
- 491 56. West RV, Harner CD. Graft Selection in Anterior Cruciate Ligament Reconstruction. *J Am*  
492 *Acad Orthop Surg*. 2005;13(3):197-207.
- 493 57. Willimon SC, Jones CR, Herzog MM, May KH, Leake MJ, Busch MT. Micheli Anterior  
494 Cruciate Ligament Reconstruction in Skeletally Immature Youths: A Retrospective Case  
495 Series With a Mean 3-Year Follow-up. *Am J Sports Med*. 2015;43(12):2974-2981.
- 496 58. Woo SL-Y, Hollis JM, Adams DJ, Lyon RM, Takai S. Tensile properties of the human  
497 femur-anterior cruciate ligament-tibia complex: The effects of specimen age and  
498 orientation. *Am J Sports Med*. 1991;19(3):217-225.
- 499 59. Woo SL-Y, Newton PO, MacKenna DA, Lyon RM. A comparative evaluation of the  
500 mechanical properties of the rabbit medial collateral and anterior cruciate ligaments. *J*  
501 *Biomech*. 1992;25(4):377-386.
- 502 60. Zhao L, Thambyah A, Broom N. Crimp morphology in the ovine anterior cruciate ligament.  
503 *J Anat*. 2015;226(3):278-288.
